# Supplementary material
Source: publisher figshare collection journal article supplement (https://geolsoc.figshare.com/ndownloader/files/22515725)
Supplement: Supplementary file 1 [file 22515725]

**Table S2**. Summary of calculated U-Pb ages and their uncertainties.

| Sample | Unit | Structural affinity | Coordinates  (BNG) | 206 Pb | date  (Ma) | Uncertainty (2σ) | | | MSWD | *n* | *#* |
| --- | --- | --- | --- | --- | --- | --- | --- | --- | --- | --- | --- |
| 238 U | *X* | *Y* | *Z* |
| RS-14-19 | Vagastie Bridge Granite | post-F2, syn-S2/L2 | NC 5350 2825 | 432.35 | | 0.10 | 0.21 | 0.51 | 2.0 | 4 | 4 |
| RS-14-18 | Klibreck Sill | post-F2, syn-S2/L2 | NC 5815 3110 | ~437 to 426.18 ± 0.26 | | | | | | | 7 |
| RS-14-20 | Creag nan Suibheag Granite | syn-S2/L2 | NC 3881 2926 | 432.93 ± 0.75 to 428.34 ± 0.29 | | | | | | | 4 |
| RS-14-26 | Creag Mhor Qtz-monzodiorite | late-S2/L2 | NC 7315 0869 | 426.76 ± 0.25 to 425.72 ± 0.21 | | | | | | | 5 |
|  |  |  |  |  | |  |  |  |  |  |  |

Notes:

BNG: British National Grid.

*X*: internal (analytical) uncertainty in the absence of all external or systematic errors.

*Y*: incorporates the U-Pb tracer calibration error.

*Z*: includes *X* and *Y*, as well as the uranium decay constant errors.

MSWD: mean square of weighted deviates.

*n*: number of analyses included in the calculated weighted mean date, out of a total number of # analyses.
